# Supplementary material for: Consistent B Cell Receptor Immunoglobulin Features Between Siblings in Familial Chronic Lymphocytic Leukemia
Source: PubMed Central journal article supplement (PMC8427434; doi:10.3389/fonc.2021.740083), 2021-08-26
Supplement: Table_4.pdf [file Table_4.pdf]

**Family 1**

| <b>Fam member</b> | <b>Aberration type</b> | <b>Cytoband</b>  | <b>Size in MB</b> | <b>Genomic localization (nucleotides)</b> | <b>Clone size (%)</b> |
|-------------------|------------------------|------------------|-------------------|-------------------------------------------|-----------------------|
| <b>1A</b>         | Loss                   | 6p22.3-6p22.2    | 1.78              | 24,469,379-26,246,276                     | 100                   |
|                   | Loss                   | 13q14.2-13q14.3  | 1.49              | 50,065,667-51,551,320                     | 90                    |
| <b>1B</b>         | Loss                   | 13q14.2-13q14.3  | 2.81              | 49,523,937-52,338,243                     | 90                    |
| <b>1C</b>         | Loss                   | 2q34-2q37.1      | 20.3              | 211,514,492-231,825,834                   | 15                    |
|                   | CNLOH                  | 6p25.1-6p21.33   | 25.4              | 6,041,659-31,485,230                      | 15                    |
|                   | Loss                   | 13q14.2-13q14.3  | 0.858             | 50,510,401-51,368,308                     | 50                    |
|                   | Loss                   | 17pter-17p11.2   | 17.5              | 1-17,583,834                              | 15                    |
| <b>1D_L</b>       | Loss                   | 13q14.2-13q14.3  | 1.725             | 49,858,608-51,583,988                     | 95                    |
|                   | Loss                   | 13q14.2-13q14.3  | 0.892             | 50,554,402-51,447,049                     | 89                    |
| <b>1D_K</b>       | Loss                   | 13q14.11-13q14.3 | 8.15              | 44,327,775-52,474,936                     | 90                    |
|                   | Loss                   | 13q14.2-13q14.3  | 1.725             | 49,858,608-51,583,988                     | 10                    |

**Family 2**

| <b>Fam member</b> | <b>Aberration type</b> | <b>Cytoband</b> | <b>Size in MB</b> | <b>Genomic localization (nucleotides)</b> | <b>Clone size (%)</b> |
|-------------------|------------------------|-----------------|-------------------|-------------------------------------------|-----------------------|
| <b>2A</b>         | gain                   | Chromosome 12   | Entire chromosome | Entire chromosome                         | 20                    |
|                   | Loss                   | 14q11.2         | 0.377             | 22,577,021-22,954,788                     | 100                   |
| <b>2B</b>         | gain                   | Chromosome 12   | Entire chromosome | Entire chromosome                         | 15                    |
|                   | Loss                   | 14              | 0.377             | 22,577,021-22,954,788                     | 100                   |

**Family 3**

| <b>Fam member</b> | <b>Aberration type</b> | <b>Cytoband</b>  | <b>Size in MB</b> | <b>Genomic localization (nucleotides)</b> | <b>Clone size (%)</b> |
|-------------------|------------------------|------------------|-------------------|-------------------------------------------|-----------------------|
| <b>3A</b>         | Loss                   | 13q14.2-13q14.3  | 3.17              | 50,563,447-51,500,576                     | 30                    |
|                   | Loss                   | 17q23            | 0.745             | 55,337,081-56,082,191                     | 90                    |
| <b>3B</b>         | Loss                   | 13q14.2-13q14.3  | 3.17              | 48,520,428-51,695,552                     | 80                    |
| <b>3C</b>         | gain                   | 8q21.3-8q24.3    | 59.1              | 87,166,395-146,285,083                    | 65                    |
|                   | CN-LOH                 | 11q13.2-qter     | 69,2              | 65,790,190-135,006,516                    | 65                    |
|                   | loss                   | 13q14.13-13q14.3 | 4.65              | 46,794,527-51,447,049                     | 90                    |
| <b>3D</b>         | Loss                   | 1p36.11          | 0.523             | 27,067,809-27,591,381                     | 85                    |
|                   | Loss                   | 13q14.2-13q14.3  | 0.740             | 50,237,742-50,977,946                     | 80                    |
